# Supplementary material for: COVID-19 Vaccine Acceptance, Attitude and Perception among Slum and Underserved Communities: A Systematic Review and Meta-Analysis
Source: MDPI journal article supplement (doi:10.3390/vaccines11050886), 2023-04-23
Supplement: s1 [file s1]

**Supplementary Table S1A.** Overall Quality assessment of included studies by Mixed Methods Appraisal Tool (MMAT) – Version 2018

| Criteria                                                                                               |            | QND<br>n=19<br>(%) | QL<br>n=3<br>(%) | MM<br>n=2<br>(%) |
|--------------------------------------------------------------------------------------------------------|------------|--------------------|------------------|------------------|
| QND1. Is the sampling strategy relevant to address the research question?                              | Yes        | 100                |                  |                  |
|                                                                                                        | No         | 0                  |                  |                  |
|                                                                                                        | Can't tell | 0                  |                  |                  |
| QND2. Is the sample representative of the target population?                                           | Yes        | 81.8               |                  |                  |
|                                                                                                        | No         | 13.6               |                  |                  |
|                                                                                                        | Can't tell | 4.6                |                  |                  |
| QND3. Are measurements appropriate (clear origin, or validity known, or standard instrument)?          | Yes        | 95.5               |                  |                  |
|                                                                                                        | No         | 0                  |                  |                  |
|                                                                                                        | Can't tell | 4.5                |                  |                  |
| QND4. Is the risk of non-response bias low?                                                            | Yes        | 45.5               |                  |                  |
|                                                                                                        | No         | 0                  |                  |                  |
|                                                                                                        | Can't tell | 54.5               |                  |                  |
| QNR5. Is the statistical analysis appropriate to answer the research question?                         | Yes        | 86.4               |                  |                  |
|                                                                                                        | No         | 13.6               |                  |                  |
|                                                                                                        | Can't tell | 0                  |                  |                  |
| QL1. Is the qualitative approach appropriate to answer the research question?                          | Yes        |                    | 100              |                  |
|                                                                                                        | No         |                    | 0                |                  |
|                                                                                                        | Can't tell |                    | 0                |                  |
| QL2. Are the qualitative data collection methods adequate to address the research question?            | Yes        |                    | 100              |                  |
|                                                                                                        | No         |                    | 0                |                  |
|                                                                                                        | Can't tell |                    | 0                |                  |
| QL3. Are the findings adequately derived from the data?                                                | Yes        |                    | 100              |                  |
|                                                                                                        | No         |                    | 0                |                  |
|                                                                                                        | Can't tell |                    | 0                |                  |
| QL4. Is the interpretation of results sufficiently substantiated by data?                              | Yes        |                    | 100              |                  |
|                                                                                                        | No         |                    | 0                |                  |
|                                                                                                        | Can't tell |                    | 0                |                  |
| QL5. Is there coherence between qualitative data sources, collection, analysis and interpretation?     | Yes        |                    | 100              |                  |
|                                                                                                        | No         |                    | 0                |                  |
|                                                                                                        | Can't tell |                    | 0                |                  |
| MM1. Is there an adequate rationale for using a mixed methods design to address the research question? | Yes        |                    |                  | 100              |
|                                                                                                        | No         |                    |                  | 0                |

|                                                                                                                         |            |     |
|-------------------------------------------------------------------------------------------------------------------------|------------|-----|
| MM2. Are the different components of the study effectively integrated to answer the research question?                  | Can't tell | 0   |
|                                                                                                                         | Yes        | 100 |
|                                                                                                                         | No         | 0   |
| MM3. Are the outputs of the integration of qualitative and quantitative components adequately interpreted?              | Can't tell | 0   |
|                                                                                                                         | Yes        | 50  |
|                                                                                                                         | No         | 0   |
| MM4. Are divergences and inconsistencies between quantitative and qualitative results adequately addressed?             | Can't tell | 50  |
|                                                                                                                         | Yes        | 100 |
|                                                                                                                         | No         | 0   |
| MM5. Do the different components of the study adhere to the quality criteria of each tradition of the methods involved? | Can't tell | 0   |
|                                                                                                                         | Yes        | 100 |
|                                                                                                                         | No         | 0   |
|                                                                                                                         | Can't tell | 0   |

QND: quantitative descriptive studies; QL: qualitative studies; MM: mixed-method studies

The MMAT assesses the quality of qualitative, quantitative, and mixed methods studies. It focuses on methodological criteria and includes five core quality criteria for each of the following five categories of study designs: (a) qualitative, (b) randomized controlled, (c) non-randomized, (d) quantitative descriptive, and (e) mixed methods. The tool uses three response options to rate each article: 'Yes' meaning the criterion is met, 'No' meaning the criterion is not met, and 'Can't tell' when there is not enough information in the paper to judge if the criterion is met or not. After rating all the studies in each study design, a summary in terms of percentage is given for each of the three response options.

**Supplementary Table S1B.** Quality assessment of each study by Mixed Methods Appraisal Tool (MMAT) – Version 2018

| Author                      | Assessment 1 | Assessment 2 | Assessment 3 | Assessment 4 | Assessment 5 | Overall Bias |
|-----------------------------|--------------|--------------|--------------|--------------|--------------|--------------|
| <b>Quantitative studies</b> |              |              |              |              |              |              |
| Lennon et al. [25]          | Yes          | Yes          | Yes          | Can't tell   | Yes          | Low          |
| Kusuma et al. [27]          | Yes          | Yes          | Yes          | Yes          | Yes          | Low          |
| Hasan et al. [28]           | Yes          | Yes          | Yes          | Can't tell   | Yes          | Low          |
| Sunil et al. [29]           | Yes          | Yes          | Yes          | Can't tell   | No           | High         |
| Aguilar et al. [30]         | Yes          | Yes          | Yes          | Can't tell   | Yes          | Low          |
| Cohrs et al. [31]           | Yes          | No           | Yes          | Yes          | Yes          | Low          |

|                             |     |            |            |            |     |      |
|-----------------------------|-----|------------|------------|------------|-----|------|
| Nasimiyu et al. [32]        | Yes | Yes        | Yes        | Yes        | Yes | Low  |
| Doherty et al. [33]         | Yes | Yes        | Yes        | Yes        | Yes | Low  |
| Patwary et al. [34]         | Yes | Yes        | Yes        | Yes        | Yes | Low  |
| Crozier et al. [35]         | Yes | Yes        | Yes        | Can't tell | Yes | Low  |
| Bhartiya et al. [38]        | Yes | Yes        | Yes        | Can't tell | No  | High |
| Kazmi et al. [39]           | Yes | Yes        | Yes        | Can't tell | Yes | Low  |
| Coman et al. [40]           | Yes | No         | Yes        | Can't tell | Yes | High |
| Kawuki et al. [41]          | Yes | Yes        | Yes        | Yes        | Yes | Low  |
| Abedin et al. [42]          | Yes | Can't tell | Yes        | Yes        | Yes | Low  |
| Nabirye et al. [43]         | Yes | Yes        | Yes        | Can't tell | Yes | Low  |
| Mamun et al. [44]           | Yes | Yes        | Can't tell | Can't tell | No  | High |
| Wang et al. [45]            | Yes | Yes        | Yes        | Yes        | Yes | Low  |
| Campagnoli et al. [47]      | Yes | No         | Yes        | Yes        | Yes | Low  |
| <b>Qualitative studies</b>  |     |            |            |            |     |      |
| Alam et al. [26]            | Yes | Yes        | Yes        | Yes        | Yes | Low  |
| Robinson et al. [48]        | Yes | Yes        | Yes        | Yes        | Yes | Low  |
| Qasim et al. [37]           | Yes | Yes        | Yes        | Yes        | Yes | Low  |
| <b>Mixed-method studies</b> |     |            |            |            |     |      |
| Tamisetty et al. [36]       | Yes | Yes        | Yes        | Yes        | Yes | Low  |
| Garcini et al. [46]         | Yes | Yes        | Can't tell | Yes        | Yes | Low  |

---

Assessments 1-5 correspond to the specific five assessment questions for quantitative, qualitative and mixed-method studies detailed in Supplementary Table S1A
